# Supplementary material
Source: PubMed Central journal article supplement (PMC4514558)
Supplement: NIHMS701411-supplement-216_2015_8803_MOESM1_ESM.pdf [file NIHMS701411-supplement-216_2015_8803_MOESM1_ESM.pdf]

## **Analytical and Bioanalytical Chemistry**

### **Electronic Supplementary Material**

#### **Profiling of adrenocorticotrophic hormone and arginine vasopressin in human pituitary gland and tumor thin tissue sections using droplet-based liquid microjunction surface sampling-HPLC-ESI-MS/MS**

Vilmos Kertesz, David Calligaris, Daniel R. Feldman, Armen Changelian, Edward R. Laws, Sandro Santagata, Nathalie Y.R. Agar, Gary J. Van Berkel

Supplementary Video - 216\_2015\_8803\_MOESM2\_ESM.mpg

|                  | AVP                         | ACTH                        |
|------------------|-----------------------------|-----------------------------|
| <b>Pit6 AH</b>   | $2.34 \pm 1.44 \times 10^3$ | $1.17 \pm 0.80 \times 10^6$ |
| <b>Pit6 NH</b>   | $5.80 \pm 1.58 \times 10^5$ | $1.78 \pm 1.19 \times 10^4$ |
| <b>A3 Tumor</b>  | $3.91 \pm 2.29 \times 10^4$ | $2.04 \pm 0.86 \times 10^5$ |
| <b>A3 Normal</b> | $4.76 \pm 0.72 \times 10^5$ | $4.39 \pm 0.31 \times 10^4$ |
| <b>A4</b>        | $3.91 \pm 1.33 \times 10^2$ | $4.14 \pm 1.38 \times 10^5$ |
| <b>A5</b>        | $2.58 \pm 1.05 \times 10^3$ | $1.29 \pm 0.71 \times 10^4$ |
| <b>N1</b>        | $1.84 \pm 0.95 \times 10^3$ | $3.36 \pm 1.32 \times 10^3$ |
| <b>Blank</b>     | $1.04 \pm 0.87 \times 10^3$ | $1.62 \pm 1.50 \times 10^3$ |

**Table S1** Averaged integrated MRM peak areas and standard deviation obtained for AVP and ACTH from the different tissue samples. These values are plot in Figure 3 of the main text

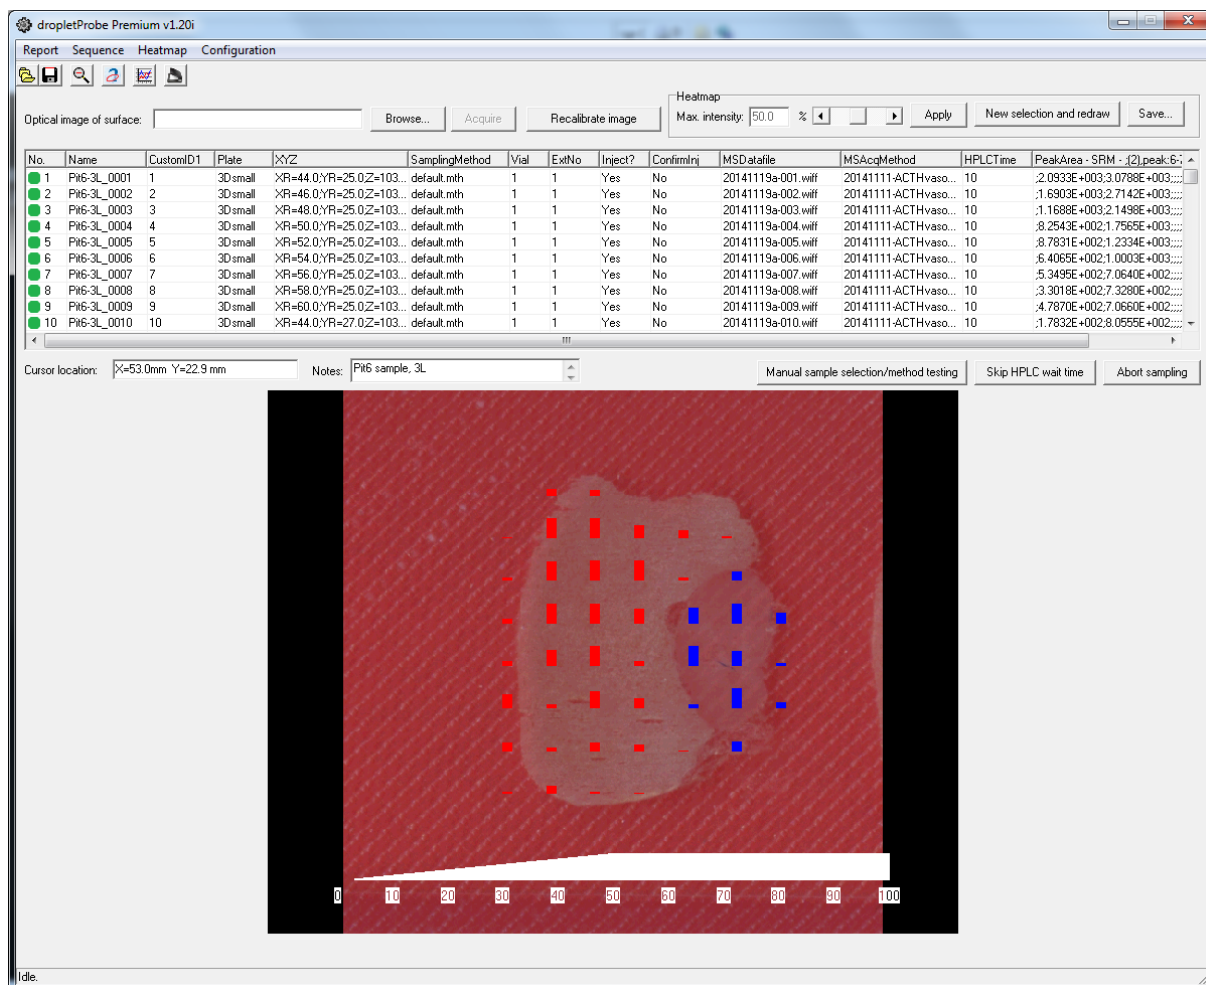

**Fig. S1** Screenshot of the main screen of software dropletProbe Premium<sup>®</sup> showing the sample list with experimental parameters (top section) and the heatmap of two proteins overlaid on the optical image of a thin tissue section of a human pituitary gland section (red: ACTH, blue: AVP; bottom section)

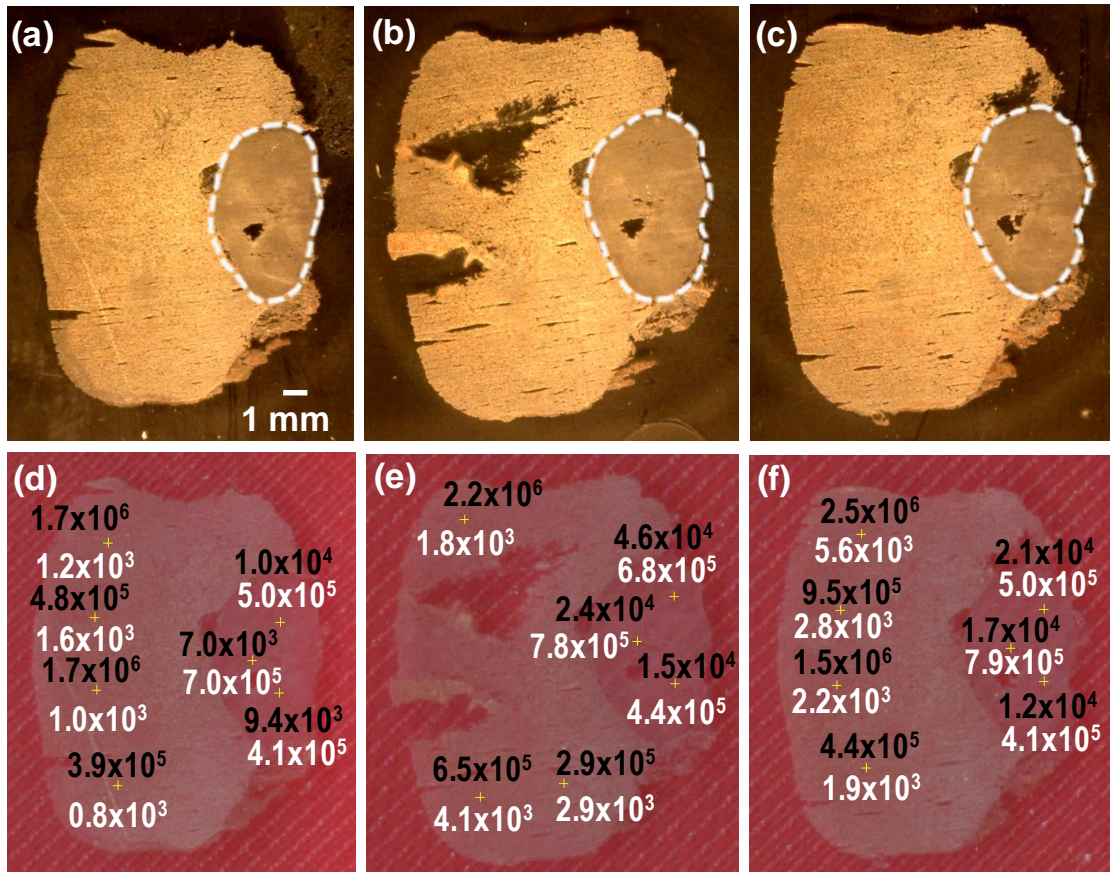

**Fig. S2** (a,b,c) Optical images of three thin tissue sections coded Pit6 on glass taken pre-analysis with scale bar shown in (a) and with NH region of the pituitary gland indicated by dashed white lines in (a)-(c). (d,e,f) Corresponding optical images showing the sampled surface locations (yellow plus signs) and integrated peak areas in counts for cpds 1 (white lettering) and 2 (black lettering)

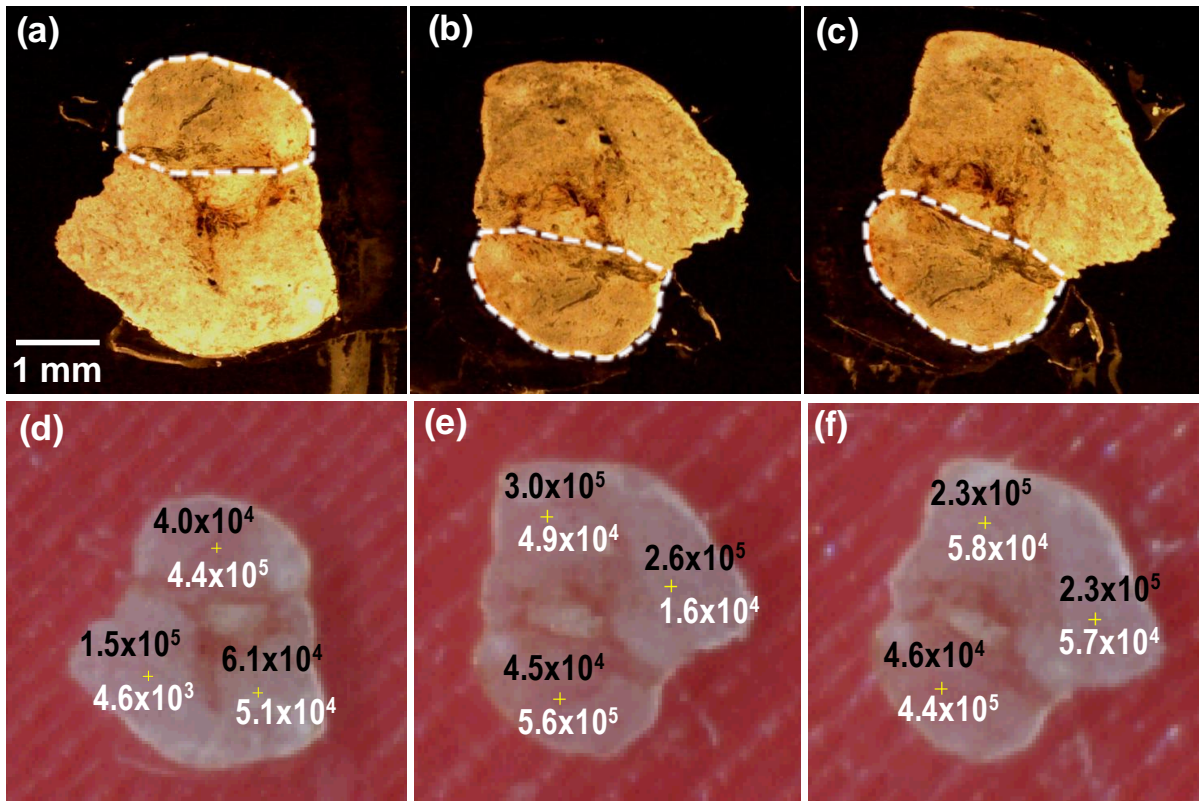

**Fig. S3** (a,b,c) Optical images of three thin tissue sections coded A3 on glass taken pre-analysis with scale bar shown in (a) and with normal pituitary NH region indicated by dashed white lines in (a)-(c). (d,e,f) Corresponding optical images showing the sampled surface locations (yellow plus signs) and integrated peak areas in counts for cpds 1 (white lettering) and 2 (black lettering)

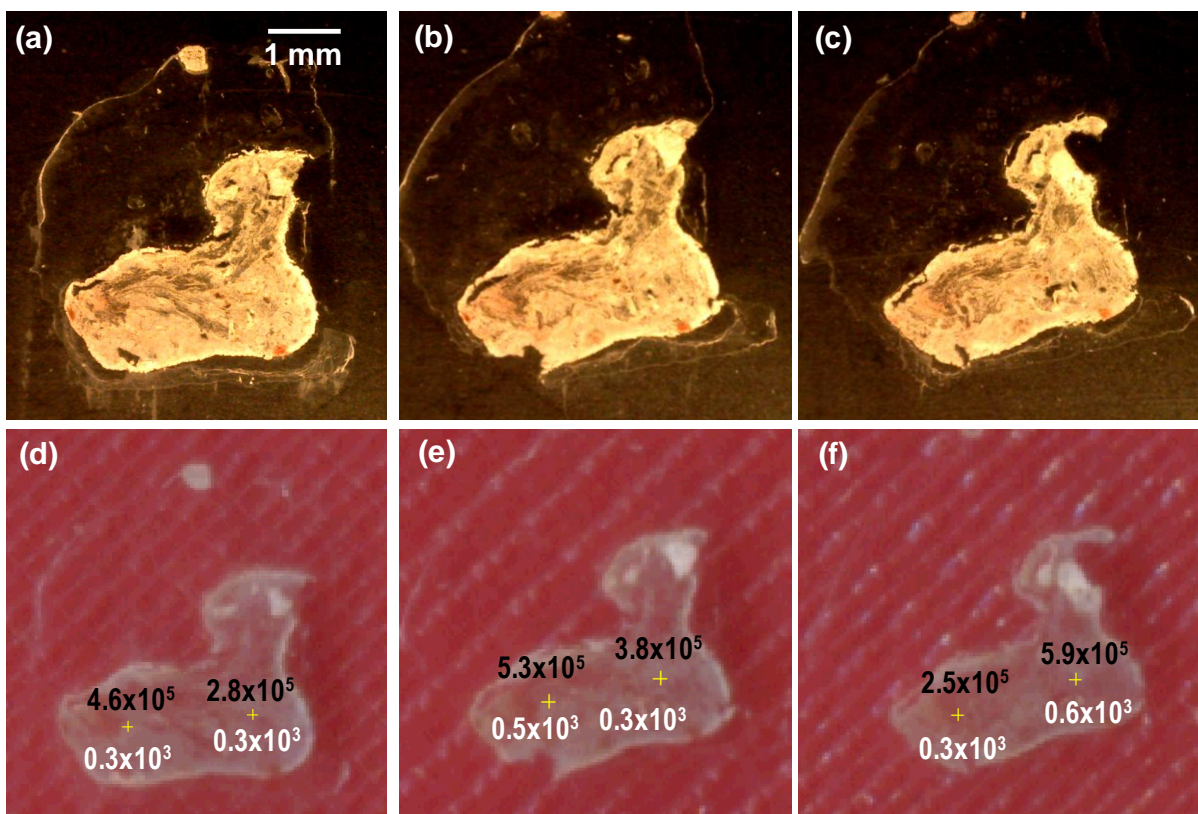

**Fig. S4** (a,b,c) Optical images of three thin tissue sections coded A4 on glass taken pre-analysis with scale bar shown in (a). (d,e,f) Corresponding optical images showing the sampled surface locations (yellow plus signs) and integrated peak areas in counts for cpds 1 (white lettering) and 2 (black lettering)

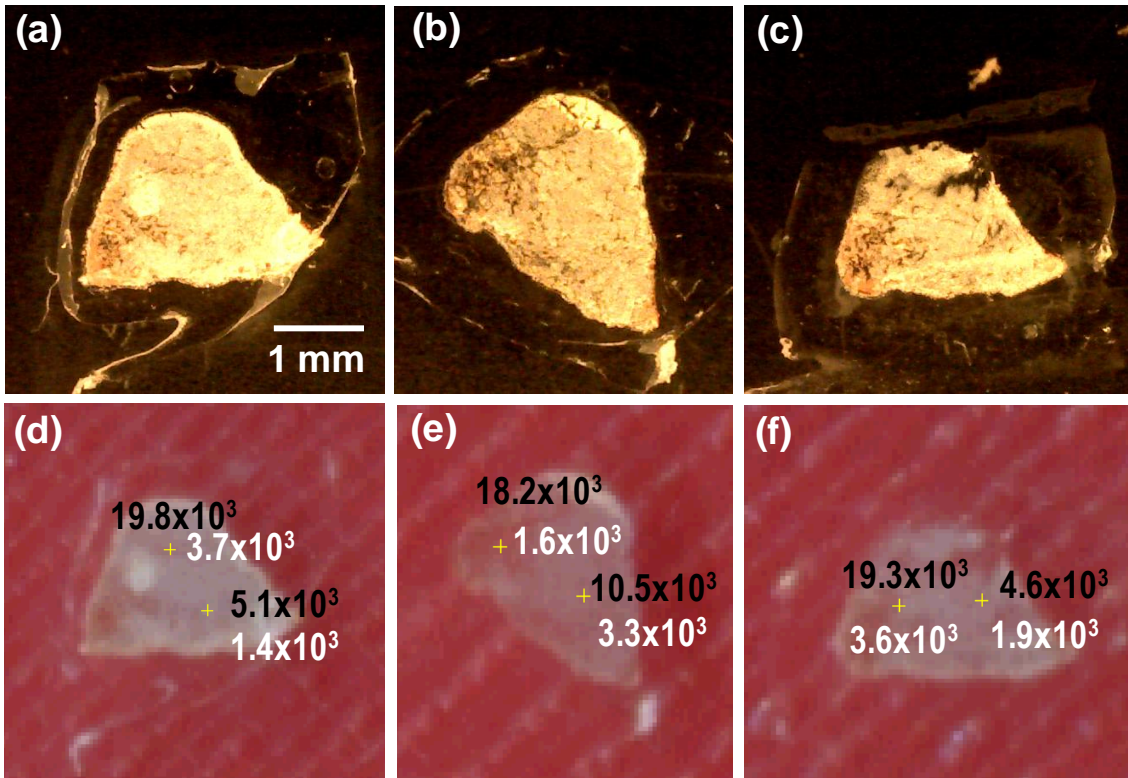

**Fig. S5** (a,b,c) Optical images of three thin tissue sections coded A5 on glass taken pre-analysis with scale bar shown in (a). (d,e,f) Corresponding optical images showing the sampled surface locations (yellow plus signs) and integrated peak areas in counts for cpds 1 (white lettering) and 2 (black lettering)

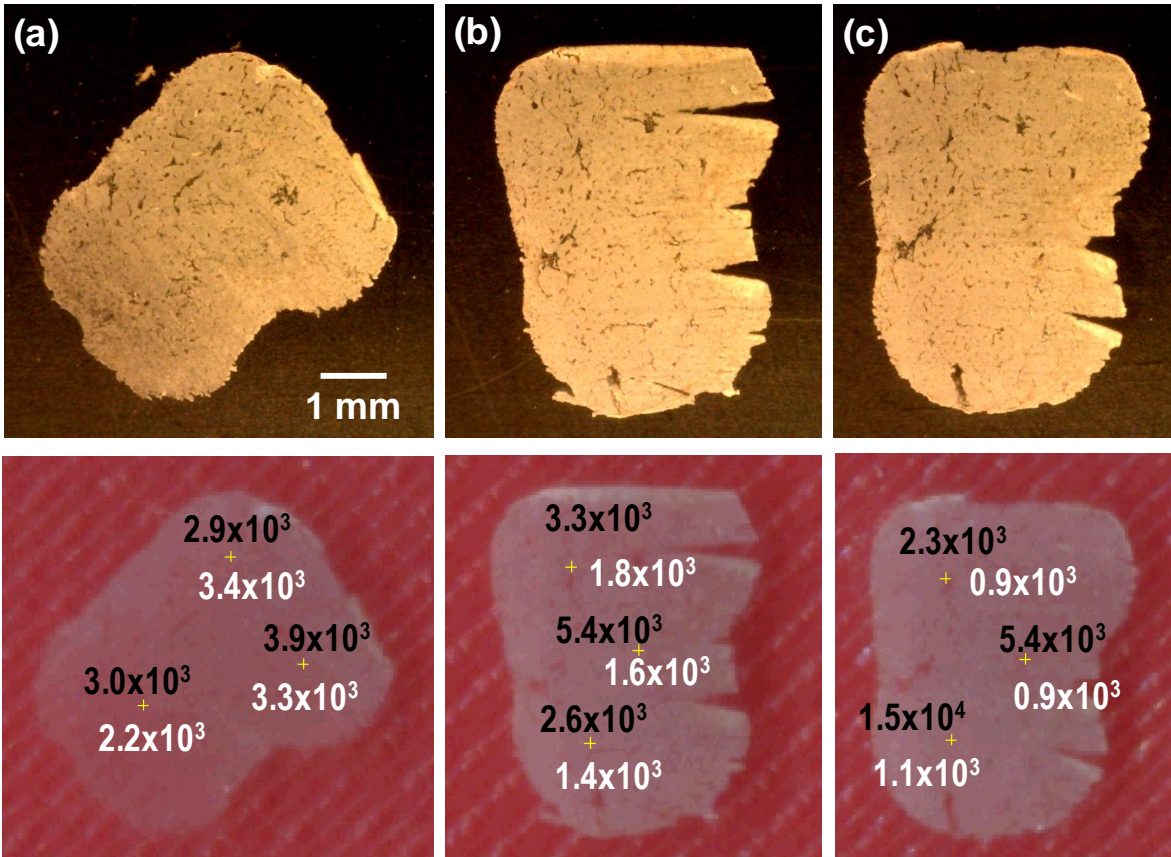

**Fig. S6** (a,b,c) Optical images of three thin tissue sections coded N1 on glass taken pre-analysis with scale bar shown in (a). (d,e,f) Corresponding optical images showing the sampled surface locations (yellow plus signs) and integrated peak areas in counts for cpds 1 (white lettering) and 2 (black lettering)
